# Supplementary material for: Identifying and Analyzing Novel Epilepsy-Related Genes Using Random Walk with Restart Algorithm
Source: Biomed Res Int. 2017 Feb 1;2017:6132436. doi: 10.1155/2017/6132436 (PMC5309434; doi:10.1155/2017/6132436)
Supplement: Supplementary file 1 — The Supplementary Material consists of three files. In detail, Supplementary Material S1 lists 470 genes related to epilepsy with their Ensembl IDs and gene symbols; Supplementary Material S2 lists 6,886 RWR genes derived from RWR algorithm with probability larger than 1E-05; Supplementary Material S3 lists 980 candidate genes with permutation FDRs less than 0.05. [file 6132436.f1.xlsx]

## Sheet: Sheet1
Supplementary Material S1. 470 genes related to epilepsy with their Ensemble IDs and gene symbols.
No.	Ensembl ID	Gene symbol
1	ENSP00000023897	GABRA1
2	ENSP00000026218	PIGQ
3	ENSP00000042931	BEST2
4	ENSP00000053867	GRN
5	ENSP00000164024	CELSR3
6	ENSP00000168216	HSD17B10
7	ENSP00000200181	ITGB4
8	ENSP00000215095	STX1B
9	ENSP00000216075	MIOX
10	ENSP00000216124	ARSA
11	ENSP00000217182	EEF1A2
12	ENSP00000217426	AHCY
13	ENSP00000218075	GLRA2
14	ENSP00000219689	USP31
15	ENSP00000219794	BCKDK
16	ENSP00000222145	RASIP1
17	ENSP00000225567	GOSR2
18	ENSP00000225573	PNPO
19	ENSP00000226578	MANBA
20	ENSP00000227507	CCND1
21	ENSP00000228437	PRDM4
22	ENSP00000228476	DAO
23	ENSP00000230124	FIG4
24	ENSP00000231484	PCDH12
25	ENSP00000231572	RARS
26	ENSP00000232003	HRG
27	ENSP00000234040	PASK
28	ENSP00000236959	ATIC
29	ENSP00000238789	ATAD2B
30	ENSP00000238994	PPP1R3C
31	ENSP00000241014	MAPK8IP1
32	ENSP00000241312	CSMD2
33	ENSP00000242351	ZC3HAV1
34	ENSP00000243347	TNFAIP6
35	ENSP00000244565	UNC5CL
36	ENSP00000245838	THOC2
37	ENSP00000245960	CDC25B
38	ENSP00000247138	SLC35A2
39	ENSP00000249806	CLN6
40	ENSP00000251287	HCN2
41	ENSP00000251472	MAST1
42	ENSP00000252542	SAFB2
43	ENSP00000253008	PRDM12
44	ENSP00000253122	SLC6A8
45	ENSP00000253247	NOL11
46	ENSP00000253401	ARHGEF9
47	ENSP00000253727	NR1H2
48	ENSP00000254250	THAP1
49	ENSP00000254466	GAS2L2
50	ENSP00000254759	COQ3
51	ENSP00000256246	TEX15
52	ENSP00000256433	IER3IP1
53	ENSP00000259351	RALGPS1
54	ENSP00000260229	MMP27
55	ENSP00000260404	PAK6
56	ENSP00000260570	IFT172
57	ENSP00000261434	LIAS
58	ENSP00000261590	DSG2
59	ENSP00000261726	CUX2
60	ENSP00000261917	HCN4
61	ENSP00000261937	FLT4
62	ENSP00000262041	MEOX2
63	ENSP00000262126	ANKRD12
64	ENSP00000262186	KCNH2
65	ENSP00000262269	MYH14
66	ENSP00000262367	CREBBP
67	ENSP00000262493	GNAO1
68	ENSP00000262640	VAMP7
69	ENSP00000262738	CELSR1
70	ENSP00000262848	PRKX
71	ENSP00000262879	RALGAPB
72	ENSP00000262915	ST3GAL3
73	ENSP00000263035	DHTKD1
74	ENSP00000263126	AKR1C4
75	ENSP00000263379	IL27RA
76	ENSP00000263650	OSBPL5
77	ENSP00000264033	CBL
78	ENSP00000264042	FARP2
79	ENSP00000264080	GPR108
80	ENSP00000264448	ALMS1
81	ENSP00000264606	HDAC4
82	ENSP00000264896	SCARB2
83	ENSP00000265029	FETUB
84	ENSP00000265379	COL6A5
85	ENSP00000265593	CLCN2
86	ENSP00000265857	GET4
87	ENSP00000265944	MYO3A
88	ENSP00000266068	GMEB2
89	ENSP00000268124	POLG
90	ENSP00000268489	ZFHX3
91	ENSP00000268704	SPG7
92	ENSP00000270066	SMG9
93	ENSP00000271277	CTTNBP2NL
94	ENSP00000272452	SULT1C4
95	ENSP00000273063	SLC4A3
96	ENSP00000273221	IQSEC1
97	ENSP00000273352	GPR128
98	ENSP00000273371	PLA1A
99	ENSP00000273588	AMT
100	ENSP00000274545	GABRA6
101	ENSP00000274680	FARS2
102	ENSP00000276072	TAF1
103	ENSP00000276571	CRH
104	ENSP00000278187	GAS2
105	ENSP00000278379	SLC1A2
106	ENSP00000279463	CNTN5
107	ENSP00000279593	GRIN2B
108	ENSP00000280560	ABCB9
109	ENSP00000280700	NGLY1
110	ENSP00000280772	ANK3
111	ENSP00000280886	DIP2C
112	ENSP00000280979	AKAP6
113	ENSP00000282059	C18orf25
114	ENSP00000282356	CAMK4
115	ENSP00000283179	HNRNPU
116	ENSP00000283228	PTPRR
117	ENSP00000283254	SCN3A
118	ENSP00000283256	SCN2A
119	ENSP00000285949	CYP26C1
120	ENSP00000286835	SCAF4
121	ENSP00000288602	BRAF
122	ENSP00000289316	HIST1H2BD
123	ENSP00000289547	NPC1L1
124	ENSP00000290374	GJD2
125	ENSP00000291568	CSTB
126	ENSP00000291572	AGPAT3
127	ENSP00000291971	NLRP8
128	ENSP00000292450	ZSCAN21
129	ENSP00000293760	LEMD2
130	ENSP00000293970	TBC1D24
131	ENSP00000294360	C1orf123
132	ENSP00000295454	GABRB1
133	ENSP00000295550	COL6A3
134	ENSP00000295645	PDCL2
135	ENSP00000295709	STK36
136	ENSP00000295777	SERPINI1
137	ENSP00000295902	PRICKLE2
138	ENSP00000295987	SYN1
139	ENSP00000296215	SNIP1
140	ENSP00000296490	WDR82
141	ENSP00000296859	RAPGEF6
142	ENSP00000297770	CPA6
143	ENSP00000298125	WDFY2
144	ENSP00000299267	GABRB3
145	ENSP00000299847	CHRFAM7A
146	ENSP00000299882	TMPRSS5
147	ENSP00000300527	COL6A2
148	ENSP00000301096	ZNF83
149	ENSP00000301962	USP42
150	ENSP00000302021	MUC7
151	ENSP00000302120	TRIM8
152	ENSP00000303248	RXFP1
153	ENSP00000303540	SCN1A
154	ENSP00000303584	N6AMT1
155	ENSP00000303686	NTSR2
156	ENSP00000304226	HIPK3
157	ENSP00000304592	FASN
158	ENSP00000304769	ZNF467
159	ENSP00000304802	DTYMK
160	ENSP00000305151	PWWP2A
161	ENSP00000305288	NLGN2
162	ENSP00000305777	CSNK1G1
163	ENSP00000305974	SLCO1A2
164	ENSP00000306095	OR10H2
165	ENSP00000306190	SLAMF1
166	ENSP00000306253	ITPR1
167	ENSP00000306330	YWHAG
168	ENSP00000306351	ZNF182
169	ENSP00000307342	HCN1
170	ENSP00000307674	CANT1
171	ENSP00000308318	PPP1R3B
172	ENSP00000309092	GMPPB
173	ENSP00000309117	RBFOX1
174	ENSP00000310873	COQ2
175	ENSP00000311273	DNAH7
176	ENSP00000311502	HEG1
177	ENSP00000311657	GRAMD2
178	ENSP00000311712	RTP1
179	ENSP00000312942	SEZ6
180	ENSP00000313059	WNK1
181	ENSP00000313500	C17orf53
182	ENSP00000313670	ALS2CL
183	ENSP00000313875	CD46
184	ENSP00000313983	WHSC1L1
185	ENSP00000314505	MCM9
186	ENSP00000314608	KLHL11
187	ENSP00000316664	IGSF8
188	ENSP00000318131	PNMAL1
189	ENSP00000318629	VPS37A
190	ENSP00000319060	CAMK2G
191	ENSP00000319417	SKA3
192	ENSP00000319636	B3GNT4
193	ENSP00000320184	MRPS23
194	ENSP00000320794	KIAA2018
195	ENSP00000321427	KCNH5
196	ENSP00000322020	SLC25A22
197	ENSP00000322270	LPHN2
198	ENSP00000323071	ACOT4
199	ENSP00000323511	PNKP
200	ENSP00000323527	MKLN1
201	ENSP00000325136	HADHB
202	ENSP00000325819	NR2F1
203	ENSP00000326366	PSEN1
204	ENSP00000327145	FLNC
205	ENSP00000328182	CLN8
206	ENSP00000328968	SCN5A
207	ENSP00000329757	ATP6V0C
208	ENSP00000330633	CNTN2
209	ENSP00000330878	KPNA7
210	ENSP00000330930	SGK223
211	ENSP00000331302	TCEB3B
212	ENSP00000332371	COL7A1
213	ENSP00000332549	GRIN2A
214	ENSP00000332806	EMILIN3
215	ENSP00000332816	PTK2B
216	ENSP00000332931	SLC8A1
217	ENSP00000333012	SS18L1
218	ENSP00000333212	CYP2U1
219	ENSP00000333496	KCND2
220	ENSP00000333627	NKAIN3
221	ENSP00000334198	CACNA1H
222	ENSP00000334869	LCE1A
223	ENSP00000337452	NIPA1
224	ENSP00000337618	NIPA2
225	ENSP00000337697	DCX
226	ENSP00000338369	CELA3B
227	ENSP00000338777	AP3S2
228	ENSP00000338812	C1QTNF6
229	ENSP00000338887	LRRC8D
230	ENSP00000339145	RRP1B
231	ENSP00000339299	TRIO
232	ENSP00000339382	PIGO
233	ENSP00000339467	RHOG
234	ENSP00000339826	PIK3AP1
235	ENSP00000340820	MAPT
236	ENSP00000340874	MEF2C
237	ENSP00000341274	ENSG00000188971
238	ENSP00000341737	NECAP1
239	ENSP00000341828	CHIA
240	ENSP00000341874	RIOK3
241	ENSP00000342709	PRR19
242	ENSP00000342935	SDCBP2
243	ENSP00000343129	TRIM29
244	ENSP00000343764	TTN
245	ENSP00000344155	ABCA2
246	ENSP00000344420	KRTAP1
247	ENSP00000344786	NFASC
248	ENSP00000345064	PRICKLE1
249	ENSP00000345464	NHLRC1
250	ENSP00000345491	PCDHB13
251	ENSP00000345689	RAB5C
252	ENSP00000346440	TCF4
253	ENSP00000346534	SCN8A
254	ENSP00000347733	TRRAP
255	ENSP00000347778	SLC26A8
256	ENSP00000348128	SVIL
257	ENSP00000348381	ADD3
258	ENSP00000348459	ACMSD
259	ENSP00000348577	RANGAP1
260	ENSP00000348634	MYH6
261	ENSP00000348848	WDR45
262	ENSP00000349041	NRARP
263	ENSP00000349168	HNRNPH1
264	ENSP00000349508	CHD4
265	ENSP00000349856	PRRC2B
266	ENSP00000350215	SEMA5B
267	ENSP00000350263	PIGN
268	ENSP00000350310	ATP2B4
269	ENSP00000351497	FCGR2B
270	ENSP00000351608	PRRT2
271	ENSP00000352011	CACNA1G
272	ENSP00000352035	KCNQ2
273	ENSP00000352182	FAM86C1
274	ENSP00000352288	PLXNB2
275	ENSP00000352336	PLCG2
276	ENSP00000352447	C1orf116
277	ENSP00000352929	CSNK1E
278	ENSP00000353104	DHDDS
279	ENSP00000353362	CACNA1A
280	ENSP00000353401	CUX1
281	ENSP00000353655	MAN2A2
282	ENSP00000353953	PAQR8
283	ENSP00000354490	ATP1A2
284	ENSP00000354558	MTOR
285	ENSP00000354621	SMURF1
286	ENSP00000354742	IPO9
287	ENSP00000354778	CNTNAP2
288	ENSP00000354855	NFE2L1
289	ENSP00000354911	TIFA
290	ENSP00000355026	ARHGEF15
291	ENSP00000355384	SLC26A11
292	ENSP00000355533	RYR2
293	ENSP00000355747	PSEN2
294	ENSP00000355969	RD3
295	ENSP00000356024	CR2
296	ENSP00000356272	RMND1
297	ENSP00000356489	EPM2A
298	ENSP00000356811	HBS1L
299	ENSP00000356908	TAAR2
300	ENSP00000357068	KCNJ10
301	ENSP00000357311	CENPW
302	ENSP00000357440	HSF2
303	ENSP00000357461	CHRNB2
304	ENSP00000357789	FLG
305	ENSP00000358038	BEND3
306	ENSP00000358042	QRSL1
307	ENSP00000358866	FLNA
308	ENSP00000359174	SLC35A3
309	ENSP00000359285	CHRNA4
310	ENSP00000359629	CRTAC1
311	ENSP00000359729	SLC9A6
312	ENSP00000359928	TNNI3K
313	ENSP00000360058	FRAT2
314	ENSP00000360107	EFHC1
315	ENSP00000360411	LDLRAD1
316	ENSP00000360472	LGI1
317	ENSP00000360475	ARRDC1
318	ENSP00000360540	CEP55
319	ENSP00000360608	GRIN1
320	ENSP00000360635	DPP7
321	ENSP00000360689	TNKS2
322	ENSP00000360806	KCNB1
323	ENSP00000360822	KCNT1
324	ENSP00000360973	AGTR2
325	ENSP00000360985	ARFGEF2
326	ENSP00000361021	PTEN
327	ENSP00000361433	EXOSC2
328	ENSP00000361824	SPTAN1
329	ENSP00000362014	DNM1
330	ENSP00000362095	SRPX2
331	ENSP00000362125	PCDH19
332	ENSP00000362187	FAM102A
333	ENSP00000362399	STXBP1
334	ENSP00000362687	DDX50
335	ENSP00000362894	RTKN2
336	ENSP00000363095	TRIM32
337	ENSP00000363349	SNX30
338	ENSP00000363387	PDIK1L
339	ENSP00000363482	FAM21C
340	ENSP00000363557	MYOM3
341	ENSP00000363827	HSPG2
342	ENSP00000364702	NBPF9
343	ENSP00000364798	ZBTB40
344	ENSP00000364839	ASXL1
345	ENSP00000365012	HCK
346	ENSP00000365536	ENSG00000250232
347	ENSP00000365714	TTYH1
348	ENSP00000366233	GABBR1
349	ENSP00000366513	CLSTN1
350	ENSP00000366549	ST3GAL5
351	ENSP00000367064	CUBN
352	ENSP00000367408	CASK
353	ENSP00000367637	MRS2
354	ENSP00000367697	ATP6AP2
355	ENSP00000367848	GABRD
356	ENSP00000368332	ARX
357	ENSP00000368790	MTRF1
358	ENSP00000368805	GCM2
359	ENSP00000369018	GPR56
360	ENSP00000369213	DDX58
361	ENSP00000369325	CDKL5
362	ENSP00000369820	PIGA
363	ENSP00000370200	SNAPC3
364	ENSP00000370213	CLCN4
365	ENSP00000371152	ASAH1
366	ENSP00000371341	TNK2
367	ENSP00000371398	GLIS3
368	ENSP00000371434	RFX3
369	ENSP00000371514	KCNV2
370	ENSP00000371546	DEPDC5
371	ENSP00000371923	RP1L1
372	ENSP00000371985	KCNA1
373	ENSP00000372437	TPTE2
374	ENSP00000373485	TSNAXIP1
375	ENSP00000373648	KCNQ3
376	ENSP00000374387	TRMT44
377	ENSP00000374399	TRMT61A
378	ENSP00000374455	SQSTM1
379	ENSP00000374467	ABCC8
380	ENSP00000375063	NLRP5
381	ENSP00000376150	SLC16A3
382	ENSP00000376204	ASH1L
383	ENSP00000377061	PLXNA1
384	ENSP00000377225	FAM50A
385	ENSP00000377570	KRT34
386	ENSP00000377747	CHD2
387	ENSP00000378260	ALG13
388	ENSP00000378735	DNAJC6
389	ENSP00000379008	SLC5A10
390	ENSP00000379326	SLC5A12
391	ENSP00000379712	IQSEC2
392	ENSP00000379754	CCDC125
393	ENSP00000379866	COL4A4
394	ENSP00000380444	MYO9B
395	ENSP00000381045	UBE3A
396	ENSP00000381097	EPHB1
397	ENSP00000381693	ZSWIM8
398	ENSP00000381932	DYRK1A
399	ENSP00000382177	MYO5A
400	ENSP00000382717	WDR19
401	ENSP00000383178	DIAPH3
402	ENSP00000383199	NEDD4L
403	ENSP00000383295	NBEA
404	ENSP00000384018	NCOR2
405	ENSP00000384582	GPR98
406	ENSP00000384792	WDR62
407	ENSP00000384863	XPO1
408	ENSP00000385006	THAP4
409	ENSP00000385026	CHRNA2
410	ENSP00000385746	SMS
411	ENSP00000385806	KCNMA1
412	ENSP00000385939	ZNF12
413	ENSP00000386229	RGS14
414	ENSP00000386306	SCN9A
415	ENSP00000386456	AAK1
416	ENSP00000386461	MYO7B
417	ENSP00000387123	ALDH7A1
418	ENSP00000387281	ADRA2B
419	ENSP00000387310	NOTUM
420	ENSP00000388658	SLC25A12
421	ENSP00000391524	DENND6B
422	ENSP00000391668	MTMR11
423	ENSP00000393262	RBFOX3
424	ENSP00000393559	PACS2
425	ENSP00000393987	FAM19A2
426	ENSP00000394168	SLCO1B7
427	ENSP00000394624	OPRM1
428	ENSP00000395220	SYTL5
429	ENSP00000395535	MECP2
430	ENSP00000396615	GLB1L3
431	ENSP00000396915	SCN1B
432	ENSP00000398177	KCTD7
433	ENSP00000398401	FAM133B
434	ENSP00000398930	SGCE
435	ENSP00000399863	ZNF839
436	ENSP00000400365	LAMA2
437	ENSP00000400815	C16orf62
438	ENSP00000403636	SYNGAP1
439	ENSP00000405482	SVOPL
440	ENSP00000407546	CHRNA7
441	ENSP00000410198	ZSCAN2
442	ENSP00000410732	GABRG2
443	ENSP00000410943	TSPYL4
444	ENSP00000411584	MSANTD1
445	ENSP00000413445	KIAA1324L
446	ENSP00000414202	PPP6R1
447	ENSP00000414334	TK2
448	ENSP00000416293	SLC2A1
449	ENSP00000417404	HFE
450	ENSP00000418081	CACNA2D2
451	ENSP00000418210	ZMYND8
452	ENSP00000419879	CDS2
453	ENSP00000420194	CASR
454	ENSP00000425556	PALLD
455	ENSP00000427562	ABL2
456	ENSP00000427975	RANBP17
457	ENSP00000429084	UBR5
458	ENSP00000429430	TENM2
459	ENSP00000431914	OR10S1
460	ENSP00000432695	KIAA1456
461	ENSP00000438949	CACNB4
462	ENSP00000444856	CUL2
463	ENSP00000452885	FAM63B
464	ENSP00000455547	ENSG00000260272
465	ENSP00000457168	SZT2
466	ENSP00000457230	WWOX
467	ENSP00000461460	ENSG00000262633
468	ENSP00000465194	MEDS
469	ENSP00000468367	ENSG00000267261
470	ENSP00000473172	RUVBL2
